# Supplementary material for: Tracking the Time-Dependent Role of the Hippocampus in Memory Recall Using DREADDs
Source: PubMed Central journal article supplement (PMC4856306; doi:10.1371/journal.pone.0154374), 2016-05-04
Supplement: pone.0154374.s001.pdf [file pone.0154374.s001.pdf]

## Supplementary Table

### P-Values for Signed Rank test between CNO and Vehicle freezing levels

|                                        | All hM4Di mice (n=12) | All hM4Di mice except subjects 4 and 9 (n=10) |
|----------------------------------------|-----------------------|-----------------------------------------------|
| Recent: CNO vs Vehicle                 | <b>0.0049</b>         | <b>0.0059</b>                                 |
| Remote 1: CNO (first test) vs Vehicle  | 0.064                 | <b>0.0488</b>                                 |
| Remote 1: CNO (second test) vs Vehicle | 0.064                 | <b>0.0137</b>                                 |
| Remote 2: CNO (first test) vs Vehicle  | 0.3013                | 0.1934                                        |
| Remote 2: CNO (second test) vs Vehicle | 0.5693                | 0.375                                         |
| N context: CNO vs Vehicle              | 1                     | 0.9453                                        |
| NS context: CNO vs Vehicle             | <b>0.000488</b>       | <b>0.002</b>                                  |

note: bold values are statistically significant ( $P < 0.05$ ). All P-values are uncorrected.
